# Supplementary material
Source: PubMed Central journal article supplement (PMC4959189)
Supplement: AEM.01129-16_zam999117274so1.pdf [file AEM.01129-16_zam999117274so1.pdf]

| Order | Allele | Sequence | [01]  | [02]  | [03]  | [04]  | [05]  | [06]  | [07]  | [08]  | [09]   | [10]   | [11]  | [12]  | [13]  | [14]  | [15]  | [16]   | [17]  | [18]  | [19]  | [20]   | [21]  | [22]  | [23]  | [24]  | [25]  | [26]  |
|-------|--------|----------|-------|-------|-------|-------|-------|-------|-------|-------|--------|--------|-------|-------|-------|-------|-------|--------|-------|-------|-------|--------|-------|-------|-------|-------|-------|-------|
| [01]  | STa1   | AGTD     |       | 98.6% | 98.6% | 98.6% | 98.6% | 91.7% | 93.1% | 91.7% | 93.1%  | 93.1%  | 91.7% | 76.4% | 75.0% | 63.9% | 63.9% | 63.9%  | 59.7% | 59.7% | 59.7% | 59.7%  | 58.3% | 21.7% | 20.3% | 18.8% | 20.3% | 20.3% |
| [02]  | STa1   | M25607   | 99.1% |       | 97.2% | 97.2% | 97.2% | 90.3% | 91.7% | 90.3% | 91.7%  | 91.7%  | 90.3% | 75.0% | 73.6% | 62.5% | 62.5% | 62.5%  | 58.3% | 58.3% | 58.3% | 58.3%  | 56.9% | 20.3% | 18.8% | 17.4% | 18.8% | 18.8% |
| [03]  | STa1   | CP006001 | 99.5% | 98.6% |       | 97.2% | 97.2% | 90.3% | 91.7% | 90.3% | 91.7%  | 91.7%  | 90.3% | 75.0% | 73.6% | 62.5% | 62.5% | 62.5%  | 58.3% | 58.3% | 58.3% | 58.3%  | 56.9% | 23.2% | 20.3% | 18.8% | 20.3% | 20.3% |
| [04]  | STa1   | AQFI     | 98.6% | 97.7% | 98.2% |       | 97.2% | 90.3% | 91.7% | 91.7% | 91.7%  | 91.7%  | 90.3% | 76.4% | 75.0% | 62.5% | 62.5% | 62.5%  | 59.7% | 59.7% | 59.7% | 59.7%  | 58.3% | 21.7% | 20.3% | 18.8% | 20.3% | 20.3% |
| [05]  | STa1   | ANWD     | 99.5% | 98.6% | 99.1% | 98.2% |       | 93.1% | 91.7% | 90.3% | 91.7%  | 91.7%  | 90.3% | 77.8% | 76.4% | 65.3% | 65.3% | 65.3%  | 61.1% | 61.1% | 61.1% | 61.1%  | 59.7% | 23.2% | 21.7% | 20.3% | 21.7% | 21.7% |
| [06]  | STa6   | AWCA     | 94.1% | 93.2% | 93.6% | 92.7% | 94.5% |       | 95.8% | 94.4% | 95.8%  | 95.8%  | 94.4% | 80.6% | 79.2% | 65.3% | 65.3% | 65.3%  | 62.5% | 62.5% | 62.5% | 62.5%  | 61.1% | 23.2% | 21.7% | 20.3% | 21.7% | 21.7% |
| [07]  | STa4   | KT992796 | 95.9% | 95.0% | 95.4% | 94.5% | 95.4% | 95.0% |       | 98.6% | 100.0% | 100.0% | 98.6% | 79.2% | 77.8% | 65.3% | 65.3% | 65.3%  | 62.5% | 62.5% | 62.5% | 62.5%  | 61.1% | 21.7% | 20.3% | 18.8% | 20.3% | 20.3% |
| [08]  | STa4   | AEZI     | 95.4% | 94.5% | 95.0% | 95.0% | 95.0% | 94.5% | 99.5% |       | 98.6%  | 98.6%  | 97.2% | 80.6% | 79.2% | 63.9% | 63.9% | 63.9%  | 63.9% | 63.9% | 63.9% | 63.9%  | 62.5% | 23.2% | 21.7% | 20.3% | 21.7% | 21.7% |
| [09]  | STa4   | JWZR     | 95.9% | 95.0% | 95.4% | 94.5% | 95.4% | 94.5% | 99.1% | 98.6% |        | 100.0% | 98.6% | 79.2% | 77.8% | 65.3% | 65.3% | 65.3%  | 62.5% | 62.5% | 62.5% | 62.5%  | 61.1% | 21.7% | 20.3% | 18.8% | 20.3% | 20.3% |
| [10]  | STa4   | JZDL     | 95.9% | 95.0% | 95.4% | 94.5% | 95.4% | 94.5% | 99.1% | 98.6% | 99.1%  |        | 98.6% | 79.2% | 77.8% | 65.3% | 65.3% | 65.3%  | 62.5% | 62.5% | 62.5% | 62.5%  | 61.1% | 21.7% | 20.3% | 18.8% | 20.3% | 20.3% |
| [11]  | STa4   | LFZH     | 95.4% | 94.5% | 95.0% | 94.1% | 95.0% | 94.1% | 98.6% | 98.2% | 98.6%  | 99.5%  |       | 77.8% | 76.4% | 63.9% | 63.9% | 63.9%  | 61.1% | 61.1% | 61.1% | 61.1%  | 59.7% | 20.3% | 18.8% | 17.4% | 18.8% | 18.8% |
| [12]  | STa5   | AEJX     | 86.3% | 85.4% | 85.8% | 85.8% | 86.8% | 85.8% | 88.6% | 89.0% | 88.6%  | 89.5%  | 89.0% |       | 97.2% | 56.9% | 56.9% | 56.9%  | 58.3% | 58.3% | 58.3% | 58.3%  | 58.3% | 23.2% | 23.2% | 23.2% | 23.2% | 23.2% |
| [13]  | STa5   | LFZI     | 85.8% | 84.9% | 85.4% | 85.4% | 86.3% | 85.4% | 88.1% | 88.6% | 88.1%  | 89.0%  | 88.6% | 99.1% |       | 55.6% | 55.6% | 55.6%  | 56.9% | 56.9% | 56.9% | 56.9%  | 56.9% | 23.2% | 23.2% | 23.2% | 23.2% | 23.2% |
| [14]  | STa2   | FN649418 | 72.2% | 71.2% | 71.7% | 71.2% | 72.6% | 72.2% | 73.5% | 73.1% | 73.5%  | 74.4%  | 74.0% | 72.6% | 72.2% |       | 98.6% | 100.0% | 91.7% | 90.3% | 91.7% | 91.7%  | 90.3% | 26.1% | 23.2% | 23.2% | 23.2% | 23.2% |
| [15]  | STa2   | APXK     | 71.7% | 70.8% | 71.2% | 70.8% | 72.2% | 71.7% | 73.1% | 72.6% | 73.1%  | 74.0%  | 73.5% | 72.2% | 71.7% | 99.5% |       | 98.6%  | 90.3% | 88.9% | 90.3% | 90.3%  | 88.9% | 24.6% | 23.2% | 23.2% | 23.2% | 23.2% |
| [16]  | STa2   | AELD     | 72.6% | 71.7% | 72.2% | 71.7% | 73.1% | 72.6% | 74.0% | 73.5% | 74.0%  | 74.9%  | 74.4% | 73.1% | 72.6% | 99.5% | 99.1% |        | 91.7% | 90.3% | 91.7% | 91.7%  | 90.3% | 26.1% | 23.2% | 23.2% | 23.2% | 23.2% |
| [17]  | STa3   | CP006002 | 70.3% | 69.4% | 69.9% | 70.3% | 70.8% | 70.8% | 71.7% | 72.2% | 71.7%  | 72.6%  | 72.2% | 71.7% | 71.2% | 95.0% | 94.5% | 94.5%  |       | 97.2% | 98.6% | 98.6%  | 97.2% | 27.5% | 27.5% | 27.5% | 27.5% | 27.5% |
| [18]  | STa3   | M34916   | 69.9% | 69.0% | 69.4% | 69.9% | 70.3% | 70.3% | 71.2% | 71.7% | 71.2%  | 72.2%  | 71.7% | 71.2% | 70.8% | 95.0% | 94.5% | 94.5%  | 99.1% |       | 98.6% | 98.6%  | 97.2% | 29.0% | 29.0% | 29.0% | 29.0% | 29.0% |
| [19]  | STa3   | CP000795 | 69.9% | 69.0% | 69.4% | 69.9% | 70.3% | 70.3% | 71.2% | 71.7% | 71.2%  | 72.2%  | 71.7% | 71.2% | 70.8% | 95.4% | 95.0% | 95.0%  | 99.5% | 99.5% |       | 100.0% | 98.6% | 29.0% | 29.0% | 29.0% | 29.0% | 29.0% |
| [20]  | STa3   | APZN     | 69.4% | 68.5% | 69.0% | 69.4% | 69.9% | 69.9% | 70.8% | 71.2% | 70.8%  | 71.7%  | 71.2% | 70.8% | 70.3% | 95.0% | 94.5% | 94.5%  | 99.1% | 99.1% | 99.5% |        | 98.6% | 29.0% | 29.0% | 29.0% | 29.0% | 29.0% |
| [21]  | STa3   | APWZ     | 69.0% | 68.0% | 68.5% | 69.0% | 69.4% | 69.4% | 70.3% | 70.8% | 70.3%  | 71.2%  | 70.8% | 71.2% | 70.8% | 94.5% | 94.1% | 94.1%  | 98.6% | 98.6% | 99.1% | 99.5%  |       | 29.0% | 29.0% | 29.0% | 29.0% | 29.0% |
| [22]  | STb2   | AFDR     | 41.0% | 40.0% | 41.4% | 40.5% | 41.4% | 41.0% | 40.0% | 40.5% | 40.5%  | 40.5%  | 40.0% | 41.0% | 41.0% | 44.3% | 43.8% | 44.8%  | 44.3% | 44.8% | 44.8% | 45.2%  | 45.2% |       | 83.1% | 81.7% | 81.7% | 83.1% |
| [23]  | STb1   | LBBN     | 41.4% | 40.5% | 41.9% | 41.9% | 41.9% | 40.5% | 40.5% | 41.0% | 41.0%  | 41.0%  | 40.5% | 41.4% | 41.4% | 45.2% | 44.8% | 44.8%  | 46.2% | 46.7% | 46.7% | 47.1%  | 47.1% | 84.3% |       | 97.2% | 97.2% | 98.6% |
| [24]  | STb1   | AJ555214 | 41.0% | 40.0% | 41.4% | 41.4% | 41.4% | 40.0% | 40.0% | 40.5% | 40.5%  | 40.5%  | 40.0% | 41.0% | 41.0% | 45.2% | 44.8% | 44.8%  | 46.2% | 46.7% | 46.7% | 47.1%  | 47.1% | 83.3% | 99.1% |       | 97.2% | 98.6% |
| [25]  | STb1   | AFAB     | 41.0% | 40.0% | 41.4% | 41.4% | 41.4% | 40.0% | 40.0% | 40.5% | 40.5%  | 40.5%  | 40.0% | 41.4% | 41.4% | 44.8% | 44.3% | 44.3%  | 45.7% | 46.2% | 46.2% | 46.7%  | 46.7% | 83.3% | 99.1% | 99.1% |       | 98.6% |
| [26]  | STb1   | JZXA     | 41.4% | 40.5% | 41.9% | 41.9% | 41.9% | 40.5% | 40.5% | 41.0% | 41.0%  | 41.0%  | 40.5% | 41.4% | 41.4% | 45.2% | 44.8% | 44.8%  | 46.2% | 46.7% | 46.7% | 47.1%  | 47.1% | 83.8% | 99.5% | 99.5% | 99.5% |       |

Figure S1. Pairwise similarity matrix of the STa/STb sequences analyzed in this study.

This matrix was generated by calculating the pairwise proportion distances in MEGA3 and then converting the resulting differences (p) to similarities (1-p).

Values are color-coded from high to low on a green to red scale; nucleotide values are below the diagonal and amino acid values are above.
